# Supplementary material
Source: PubMed Central journal article supplement (PMC4020516)
Supplement: NIHMS512228-supplement-1_si_001.pdf [file NIHMS512228-supplement-1_si_001.pdf]

**Table S1.** The linear extrapolated and the experimental  $T_1/T_2$  values of EIAV-CA.

| Residue Number | “0” mM    |                      | 0.053 mM  |                      | 0.106 mM  |                      | 0.213 mM  |                      | 0.426 mM  |                      |
|----------------|-----------|----------------------|-----------|----------------------|-----------|----------------------|-----------|----------------------|-----------|----------------------|
|                | $T_1/T_2$ | $\delta_{(T_1/T_2)}$ |
| 4              | 21.83     | 0.86                 | 24.10     | 1.18                 | 25.97     | 0.87                 | 31.27     | 0.52                 | 39.82     | 0.77                 |
| 5              | 17.24     | 0.36                 | 18.32     | 0.50                 | 20.65     | 0.45                 | 23.42     | 0.43                 | 29.25     | 0.46                 |
| 6              | 14.18     | 0.81                 | 16.61     | 1.12                 | 15.04     | 0.83                 | 17.92     | 0.77                 | 23.18     | 0.92                 |
| 7              | 14.44     | 0.21                 | 15.46     | 0.25                 | 17.24     | 0.17                 | 19.73     | 0.21                 | 24.74     | 0.24                 |
| 8              | 18.20     | 0.34                 | 19.70     | 0.31                 | 20.39     | 0.49                 | 23.27     | 0.35                 | 28.52     | 0.42                 |
| 9              | 12.48     | 0.17                 | 13.71     | 0.20                 | 14.76     | 0.19                 | 17.38     | 0.20                 | 22.10     | 0.26                 |
| 11             | 20.46     | 0.33                 | 22.49     | 0.47                 | 24.28     | 0.37                 | 27.32     | 0.25                 | 35.48     | 0.43                 |
| 12             | 23.27     | 0.61                 | 26.00     | 0.67                 | 26.11     | 0.54                 | 30.59     | 0.54                 | 38.65     | 0.74                 |
| 13             | 12.84     | 1.60                 | 14.92     | 2.59                 | 17.89     | 1.44                 | 21.56     | 0.85                 | 31.34     | 0.69                 |
| 15             | 14.87     | 0.53                 | 16.23     | 0.82                 | 17.25     | 0.56                 | 19.33     | 0.29                 | 24.61     | 0.47                 |
| 16             | 15.22     | 0.45                 | 15.86     | 0.70                 | 18.19     | 0.29                 | 21.21     | 0.37                 | 25.63     | 0.34                 |
| 23             | 25.95     | 1.97                 | 28.99     | 2.42                 | 31.71     | 2.07                 | 38.47     | 1.85                 | 49.43     | 1.20                 |
| 24             | 27.44     | 2.00                 | 29.18     | 2.75                 | 32.44     | 1.76                 | 35.06     | 1.43                 | 45.08     | 1.39                 |
| 25             | 26.67     | 0.63                 | 29.12     | 0.84                 | 32.11     | 0.80                 | 37.59     | 0.49                 | 47.89     | 0.67                 |
| 26             | 29.59     | 0.59                 | 32.66     | 0.70                 | 34.68     | 0.71                 | 38.71     | 0.43                 | 50.24     | 0.51                 |
| 27             | 27.35     | 0.85                 | 29.69     | 1.08                 | 32.75     | 0.79                 | 36.43     | 0.65                 | 47.07     | 0.54                 |
| 28             | 23.89     | 0.66                 | 25.84     | 0.81                 | 28.68     | 0.88                 | 32.43     | 0.59                 | 41.55     | 0.48                 |
| 29             | 26.73     | 0.92                 | 28.78     | 1.16                 | 31.67     | 0.78                 | 35.20     | 0.77                 | 44.09     | 0.94                 |
| 31             | 20.97     | 0.55                 | 23.17     | 0.83                 | 23.90     | 0.45                 | 27.52     | 0.57                 | 34.86     | 0.50                 |
| 32             | 19.46     | 0.76                 | 21.92     | 1.16                 | 21.97     | 0.70                 | 25.68     | 0.86                 | 32.62     | 0.40                 |

|    |           |      |           |      |           |      |           |      |           |      |
|----|-----------|------|-----------|------|-----------|------|-----------|------|-----------|------|
| 33 | 20.2<br>6 | 0.50 | 22.5<br>5 | 0.70 | 24.7<br>6 | 0.48 | 28.5<br>6 | 0.47 | 37.8<br>9 | 0.61 |
| 34 | 29.1<br>3 | 1.28 | 31.2<br>6 | 1.87 | 33.3<br>5 | 1.34 | 37.2<br>6 | 0.74 | 46.3<br>0 | 0.41 |
| 35 | 26.9<br>4 | 2.45 | 30.2<br>0 | 3.62 | 33.2<br>7 | 2.19 | 36.9<br>8 | 1.31 | 51.0<br>7 | 1.69 |
| 36 | 25.6<br>6 | 1.31 | 26.8<br>2 | 1.82 | 33.8<br>2 | 1.43 | 37.0<br>9 | 0.87 | 48.7<br>9 | 0.72 |
| 37 | 20.2<br>1 | 4.41 | 21.8<br>5 | 5.31 | 31.5<br>1 | 3.99 | 38.9<br>0 | 1.75 | 53.9<br>0 | 2.98 |
| 39 | 31.4<br>0 | 1.44 | 35.0<br>3 | 2.03 | 36.3<br>0 | 0.96 | 42.7<br>4 | 1.15 | 54.4<br>1 | 1.11 |
| 40 | 30.1<br>2 | 1.86 | 32.4<br>6 | 2.72 | 36.2<br>1 | 1.05 | 39.4<br>9 | 0.99 | 51.7<br>4 | 1.02 |
| 42 | 30.3<br>0 | 1.82 | 29.7<br>0 | 2.47 | 41.1<br>8 | 2.05 | 41.8<br>7 | 1.35 | 53.7<br>6 | 1.17 |
| 52 | 23.1<br>2 | 2.15 | 27.7<br>6 | 3.42 | 25.3<br>7 | 1.34 | 32.4<br>0 | 0.90 | 41.8<br>6 | 1.08 |
| 55 | 23.8<br>7 | 3.29 | 24.8<br>6 | 4.21 | 30.5<br>3 | 4.28 | 34.2<br>5 | 2.37 | 46.0<br>0 | 3.72 |
| 57 | 29.3<br>0 | 1.03 | 29.2<br>8 | 1.46 | 36.3<br>3 | 1.58 | 37.4<br>3 | 0.78 | 46.4<br>9 | 0.85 |
| 58 | 26.8<br>2 | 1.14 | 29.6<br>7 | 1.62 | 30.6<br>1 | 0.73 | 34.6<br>6 | 0.63 | 44.2<br>1 | 0.60 |
| 59 | 18.0<br>8 | 1.46 | 19.2<br>3 | 2.14 | 23.7<br>8 | 1.49 | 27.5<br>4 | 1.40 | 35.6<br>9 | 0.83 |
| 60 | 17.6<br>9 | 0.99 | 19.8<br>0 | 1.43 | 20.6<br>7 | 0.83 | 23.7<br>8 | 0.51 | 30.5<br>1 | 0.81 |
| 62 | 18.2<br>1 | 0.41 | 19.5<br>6 | 0.42 | 21.0<br>1 | 0.61 | 23.7<br>6 | 0.44 | 29.4<br>7 | 0.46 |
| 63 | 16.0<br>5 | 0.58 | 17.1<br>1 | 0.69 | 19.1<br>4 | 0.49 | 21.7<br>3 | 0.48 | 27.1<br>3 | 0.54 |
| 64 | 16.5<br>3 | 0.60 | 17.8<br>5 | 0.84 | 18.6<br>7 | 0.48 | 20.7<br>0 | 0.32 | 25.6<br>2 | 0.35 |
| 65 | 25.0<br>2 | 2.94 | 27.3<br>0 | 4.57 | 25.9<br>4 | 2.52 | 24.2<br>6 | 2.08 | 30.7<br>9 | 1.35 |
| 66 | 16.7<br>9 | 0.80 | 17.8<br>9 | 1.16 | 21.9<br>2 | 0.89 | 24.4<br>8 | 0.41 | 32.7<br>3 | 0.56 |
| 67 | 20.0<br>7 | 1.04 | 23.1<br>8 | 1.38 | 24.7<br>6 | 1.00 | 28.7<br>3 | 0.81 | 39.7<br>7 | 0.64 |
| 69 | 22.1<br>0 | 1.00 | 24.0<br>4 | 1.27 | 25.9<br>0 | 1.15 | 28.5<br>9 | 0.83 | 36.3<br>1 | 0.79 |
| 71 | 21.7<br>5 | 0.79 | 24.5<br>5 | 1.18 | 26.0<br>6 | 0.73 | 29.7<br>6 | 0.32 | 39.9<br>3 | 0.54 |
| 72 | 24.2<br>6 | 1.33 | 25.5<br>8 | 1.90 | 27.6<br>2 | 1.25 | 32.7<br>1 | 0.92 | 38.8<br>5 | 0.82 |

|     |           |      |           |      |           |      |           |      |           |      |
|-----|-----------|------|-----------|------|-----------|------|-----------|------|-----------|------|
| 73  | 18.9<br>8 | 0.60 | 21.2<br>1 | 0.93 | 23.4<br>2 | 0.64 | 27.7<br>9 | 0.68 | 36.9<br>3 | 0.54 |
| 75  | 17.9<br>9 | 3.93 | 20.2<br>1 | 6.18 | 22.9<br>3 | 4.80 | 27.4<br>1 | 1.98 | 39.0<br>3 | 1.96 |
| 76  | 23.2<br>0 | 0.79 | 26.4<br>8 | 1.06 | 28.1<br>6 | 1.19 | 29.8<br>3 | 0.61 | 42.2<br>7 | 1.09 |
| 77  | 21.6<br>9 | 2.72 | 24.3<br>9 | 4.51 | 25.4<br>7 | 1.44 | 27.4<br>3 | 1.34 | 37.8<br>2 | 1.38 |
| 78  | 25.3<br>2 | 1.50 | 28.3<br>3 | 2.42 | 27.9<br>4 | 1.00 | 32.4<br>8 | 0.88 | 40.7<br>8 | 0.48 |
| 79  | 23.0<br>0 | 1.44 | 25.5<br>8 | 2.17 | 26.9<br>3 | 1.31 | 32.3<br>7 | 0.99 | 41.2<br>4 | 0.76 |
| 80  | 21.5<br>5 | 0.84 | 22.5<br>6 | 1.54 | 26.4<br>2 | 0.83 | 29.3<br>7 | 0.59 | 36.8<br>3 | 0.53 |
| 82  | 16.4<br>2 | 4.15 | 22.3<br>0 | 6.75 | 15.5<br>0 | 3.44 | 29.8<br>8 | 3.71 | 37.0<br>9 | 2.74 |
| 83  | 22.6<br>7 | 0.90 | 25.1<br>7 | 1.31 | 27.4<br>7 | 0.64 | 31.5<br>4 | 0.47 | 41.2<br>1 | 0.83 |
| 84  | 17.8<br>4 | 0.83 | 19.6<br>4 | 1.22 | 21.8<br>7 | 0.60 | 25.4<br>7 | 0.64 | 33.0<br>3 | 0.64 |
| 85  | 21.0<br>8 | 0.59 | 23.9<br>5 | 0.82 | 23.6<br>3 | 0.61 | 28.1<br>3 | 0.31 | 35.5<br>2 | 0.48 |
| 87  | 23.4<br>3 | 0.41 | 25.1<br>6 | 0.53 | 27.5<br>3 | 0.44 | 30.6<br>7 | 0.38 | 38.4<br>6 | 0.37 |
| 92  | 20.0<br>5 | 0.36 | 22.3<br>4 | 0.46 | 22.8<br>4 | 0.31 | 26.6<br>2 | 0.33 | 33.6<br>3 | 0.22 |
| 93  | 19.8<br>0 | 0.61 | 21.6<br>0 | 0.72 | 24.2<br>4 | 0.54 | 27.8<br>4 | 0.40 | 36.2<br>1 | 0.49 |
| 94  | 19.8<br>4 | 0.55 | 22.4<br>9 | 0.68 | 23.2<br>5 | 0.59 | 26.8<br>5 | 0.49 | 35.4<br>7 | 0.54 |
| 97  | 16.8<br>3 | 0.41 | 18.4<br>6 | 0.33 | 19.8<br>2 | 0.53 | 23.4<br>9 | 0.48 | 29.5<br>8 | 0.67 |
| 98  | 15.0<br>6 | 0.33 | 16.7<br>3 | 0.43 | 18.4<br>3 | 0.26 | 21.3<br>6 | 0.42 | 28.0<br>7 | 0.41 |
| 100 | 17.3<br>9 | 0.36 | 19.2<br>5 | 0.45 | 20.9<br>9 | 0.40 | 23.3<br>4 | 0.37 | 31.0<br>5 | 0.35 |
| 102 | 23.3<br>9 | 1.13 | 26.2<br>0 | 1.70 | 25.7<br>9 | 1.03 | 27.7<br>5 | 1.00 | 36.2<br>7 | 0.96 |
| 104 | 20.4<br>2 | 0.66 | 22.1<br>3 | 0.82 | 25.0<br>2 | 0.72 | 26.8<br>5 | 0.37 | 35.6<br>7 | 0.47 |
| 106 | 18.6<br>1 | 0.70 | 20.7<br>3 | 0.93 | 22.2<br>2 | 0.55 | 26.7<br>3 | 0.53 | 34.7<br>8 | 0.59 |
| 107 | 19.6<br>2 | 0.78 | 22.6<br>9 | 0.87 | 22.6<br>0 | 0.95 | 26.4<br>2 | 0.62 | 35.7<br>0 | 0.95 |
| 108 | 17.8<br>2 | 0.74 | 21.6<br>1 | 1.05 | 22.2<br>5 | 0.55 | 27.8<br>1 | 0.48 | 39.1<br>3 | 0.62 |

|     |           |      |           |      |           |      |           |      |           |      |
|-----|-----------|------|-----------|------|-----------|------|-----------|------|-----------|------|
| 109 | 17.3<br>1 | 0.87 | 18.7<br>3 | 1.12 | 21.5<br>7 | 0.84 | 24.7<br>2 | 0.70 | 32.2<br>8 | 0.93 |
| 110 | 19.9<br>4 | 0.57 | 23.0<br>4 | 0.74 | 23.5<br>3 | 0.52 | 27.0<br>9 | 0.34 | 36.8<br>6 | 0.67 |
| 111 | 18.5<br>0 | 0.55 | 20.1<br>4 | 0.76 | 22.0<br>5 | 0.39 | 26.9<br>2 | 0.30 | 33.6<br>5 | 0.45 |
| 112 | 32.1<br>5 | 2.82 | 35.6<br>3 | 4.56 | 32.9<br>9 | 1.35 | 39.6<br>0 | 1.28 | 45.9<br>0 | 1.04 |
| 114 | 16.1<br>2 | 0.68 | 18.2<br>9 | 0.98 | 19.8<br>6 | 0.71 | 22.7<br>5 | 0.52 | 30.9<br>9 | 0.61 |
| 115 | 16.7<br>7 | 0.29 | 18.6<br>0 | 0.44 | 20.1<br>8 | 0.25 | 24.0<br>5 | 0.19 | 31.0<br>0 | 0.27 |
| 116 | 19.9<br>7 | 1.58 | 20.3<br>9 | 1.85 | 25.1<br>7 | 2.13 | 26.4<br>9 | 1.68 | 32.8<br>6 | 0.66 |
| 117 | 18.8<br>3 | 1.11 | 20.7<br>3 | 1.59 | 23.4<br>3 | 1.04 | 24.8<br>1 | 0.66 | 34.2<br>0 | 0.53 |
| 118 | 19.4<br>1 | 1.07 | 21.0<br>5 | 1.43 | 22.0<br>8 | 0.80 | 26.1<br>5 | 0.77 | 32.3<br>5 | 0.87 |
| 119 | 18.2<br>8 | 1.96 | 20.3<br>3 | 2.71 | 21.0<br>6 | 1.62 | 28.2<br>2 | 1.43 | 33.5<br>5 | 1.17 |
| 122 | 20.5<br>0 | 0.71 | 22.3<br>4 | 1.06 | 25.1<br>9 | 0.48 | 29.6<br>4 | 0.50 | 38.1<br>6 | 0.56 |
| 123 | 29.6<br>2 | 3.26 | 34.9<br>5 | 4.58 | 33.5<br>1 | 3.12 | 47.0<br>6 | 3.21 | 56.8<br>3 | 2.11 |
| 124 | 32.6<br>7 | 4.81 | 37.9<br>4 | 8.52 | 34.9<br>9 | 4.22 | 39.5<br>0 | 2.22 | 48.8<br>3 | 1.56 |
| 125 | 28.2<br>2 | 2.79 | 30.3<br>9 | 4.15 | 31.1<br>0 | 2.03 | 36.6<br>8 | 1.62 | 43.2<br>5 | 1.03 |
| 128 | 25.8<br>4 | 1.62 | 28.0<br>2 | 1.87 | 31.9<br>6 | 2.00 | 33.6<br>1 | 1.47 | 44.7<br>3 | 1.03 |
| 136 | 30.5<br>5 | 0.56 | 32.7<br>2 | 0.81 | 36.6<br>4 | 0.70 | 40.2<br>8 | 0.66 | 51.4<br>8 | 0.76 |
| 137 | 28.5<br>7 | 2.16 | 29.0<br>5 | 2.89 | 36.9<br>2 | 1.83 | 41.3<br>9 | 1.78 | 53.0<br>4 | 1.59 |
| 139 | 30.3<br>7 | 1.07 | 30.9<br>9 | 1.23 | 39.7<br>2 | 1.17 | 42.9<br>6 | 0.66 | 55.0<br>4 | 1.06 |
| 140 | 24.9<br>5 | 1.20 | 23.4<br>1 | 1.59 | 35.6<br>0 | 1.50 | 39.6<br>8 | 1.28 | 49.2<br>5 | 1.25 |
| 141 | 34.5<br>4 | 2.55 | 37.4<br>7 | 3.82 | 36.9<br>4 | 2.41 | 38.5<br>7 | 2.36 | 48.5<br>7 | 0.99 |
| 142 | 31.8<br>1 | 0.91 | 33.7<br>0 | 1.20 | 37.7<br>3 | 0.90 | 43.2<br>4 | 1.08 | 53.3<br>1 | 0.73 |
| 143 | 32.3<br>1 | 0.81 | 35.2<br>1 | 1.07 | 36.8<br>8 | 0.92 | 41.1<br>5 | 0.63 | 51.5<br>9 | 0.60 |
| 145 | 25.3<br>0 | 0.62 | 27.5<br>6 | 0.74 | 28.8<br>7 | 0.58 | 35.8<br>3 | 0.47 | 43.1<br>3 | 0.38 |

|     |           |      |           |      |           |      |           |      |           |      |
|-----|-----------|------|-----------|------|-----------|------|-----------|------|-----------|------|
| 146 | 20.3<br>3 | 0.54 | 21.4<br>6 | 0.69 | 23.7<br>9 | 0.34 | 27.1<br>0 | 0.47 | 32.9<br>6 | 0.54 |
| 149 | 11.2<br>0 | 0.17 | 12.0<br>5 | 0.24 | 13.4<br>3 | 0.07 | 14.9<br>4 | 0.15 | 19.0<br>2 | 0.13 |
| 150 | 15.8<br>1 | 0.34 | 17.0<br>2 | 0.51 | 19.4<br>9 | 0.48 | 21.8<br>2 | 0.46 | 28.2<br>6 | 0.36 |
| 151 | 17.3<br>7 | 0.54 | 19.1<br>9 | 0.72 | 20.0<br>2 | 0.42 | 23.6<br>0 | 0.42 | 29.7<br>7 | 0.51 |
| 152 | 12.7<br>2 | 0.20 | 14.4<br>5 | 0.26 | 15.5<br>7 | 0.23 | 17.8<br>8 | 0.26 | 24.3<br>7 | 0.26 |
| 153 | 13.6<br>8 | 0.27 | 15.1<br>7 | 0.39 | 16.2<br>5 | 0.27 | 18.9<br>3 | 0.23 | 24.5<br>2 | 0.17 |
| 154 | 14.9<br>0 | 0.34 | 16.7<br>7 | 0.42 | 17.7<br>9 | 0.29 | 21.1<br>2 | 0.25 | 27.6<br>3 | 0.50 |
| 155 | 13.7<br>9 | 0.44 | 15.6<br>0 | 0.68 | 16.5<br>8 | 0.43 | 19.5<br>4 | 0.39 | 26.2<br>1 | 0.62 |
| 156 | 11.4<br>6 | 0.13 | 12.9<br>1 | 0.17 | 13.8<br>8 | 0.12 | 16.8<br>7 | 0.10 | 22.0<br>8 | 0.15 |
| 157 | 19.1<br>2 | 1.27 | 20.8<br>8 | 2.31 | 22.5<br>4 | 0.84 | 26.0<br>0 | 0.91 | 31.9<br>9 | 1.11 |
| 158 | 17.4<br>8 | 0.84 | 18.4<br>5 | 1.23 | 22.0<br>9 | 0.93 | 25.9<br>4 | 0.73 | 32.7<br>1 | 0.48 |
| 159 | 12.7<br>0 | 0.30 | 14.2<br>5 | 0.42 | 15.2<br>0 | 0.21 | 17.4<br>8 | 0.31 | 23.4<br>1 | 0.36 |
| 161 | 16.8<br>1 | 0.64 | 18.3<br>8 | 0.72 | 20.8<br>9 | 0.76 | 23.5<br>3 | 0.44 | 31.3<br>8 | 0.63 |
| 163 | 15.1<br>1 | 0.52 | 17.1<br>0 | 0.76 | 18.1<br>2 | 0.46 | 20.2<br>9 | 0.51 | 27.4<br>7 | 0.31 |
| 164 | 17.9<br>7 | 0.83 | 19.9<br>4 | 1.12 | 21.5<br>7 | 1.05 | 25.5<br>0 | 0.77 | 33.4<br>6 | 0.77 |
| 165 | 18.0<br>1 | 0.51 | 20.2<br>0 | 0.88 | 20.8<br>2 | 0.49 | 24.9<br>2 | 0.29 | 31.7<br>4 | 0.31 |
| 166 | 16.3<br>4 | 0.47 | 17.9<br>5 | 0.61 | 19.8<br>1 | 0.39 | 22.6<br>4 | 0.43 | 29.7<br>8 | 0.34 |
| 167 | 16.1<br>0 | 0.52 | 17.6<br>9 | 0.69 | 20.1<br>6 | 0.47 | 23.8<br>2 | 0.46 | 31.2<br>6 | 0.37 |
| 168 | 17.9<br>0 | 0.55 | 19.6<br>7 | 0.68 | 21.3<br>9 | 0.45 | 24.4<br>9 | 0.50 | 31.6<br>9 | 0.35 |
| 169 | 16.6<br>9 | 0.35 | 18.3<br>4 | 0.46 | 20.7<br>9 | 0.44 | 23.5<br>2 | 0.17 | 31.1<br>2 | 0.19 |
| 170 | 14.6<br>6 | 0.40 | 16.8<br>8 | 0.52 | 17.6<br>8 | 0.29 | 21.0<br>8 | 0.25 | 28.4<br>3 | 0.25 |
| 171 | 16.7<br>4 | 0.30 | 18.3<br>1 | 0.39 | 20.6<br>4 | 0.27 | 23.2<br>1 | 0.25 | 30.6<br>5 | 0.28 |
| 172 | 17.3<br>5 | 0.37 | 19.3<br>8 | 0.52 | 20.7<br>5 | 0.38 | 24.5<br>9 | 0.21 | 32.0<br>4 | 0.35 |

|     |           |      |           |      |           |      |           |      |           |      |
|-----|-----------|------|-----------|------|-----------|------|-----------|------|-----------|------|
| 173 | 16.2<br>6 | 0.27 | 17.8<br>8 | 0.38 | 19.9<br>8 | 0.13 | 24.2<br>1 | 0.20 | 31.0<br>1 | 0.32 |
| 174 | 15.7<br>3 | 0.28 | 17.0<br>2 | 0.37 | 19.0<br>1 | 0.34 | 21.2<br>2 | 0.19 | 27.3<br>9 | 0.25 |
| 175 | 17.8<br>8 | 0.42 | 19.6<br>7 | 0.55 | 21.4<br>8 | 0.26 | 23.8<br>2 | 0.38 | 31.4<br>2 | 0.50 |
| 176 | 16.1<br>9 | 0.35 | 17.8<br>3 | 0.41 | 18.7<br>7 | 0.44 | 21.6<br>6 | 0.44 | 27.5<br>6 | 0.40 |
| 177 | 15.1<br>4 | 0.20 | 16.9<br>8 | 0.28 | 17.9<br>2 | 0.17 | 20.5<br>2 | 0.20 | 27.1<br>1 | 0.17 |
| 179 | 14.3<br>7 | 0.89 | 15.0<br>0 | 1.33 | 19.4<br>9 | 1.04 | 19.7<br>3 | 0.35 | 26.7<br>7 | 0.59 |
| 180 | 14.5<br>6 | 0.28 | 16.0<br>2 | 0.41 | 17.7<br>9 | 0.23 | 20.6<br>0 | 0.27 | 26.8<br>4 | 0.35 |
| 182 | 13.6<br>1 | 0.32 | 15.5<br>9 | 0.38 | 16.2<br>9 | 0.32 | 19.1<br>8 | 0.19 | 25.6<br>9 | 0.23 |
| 183 | 12.7<br>1 | 0.36 | 14.5<br>9 | 0.43 | 15.5<br>9 | 0.22 | 15.4<br>7 | 0.32 | 23.1<br>9 | 0.45 |
| 184 | 14.8<br>2 | 0.29 | 16.6<br>6 | 0.32 | 17.7<br>0 | 0.37 | 21.5<br>8 | 0.33 | 28.0<br>1 | 0.44 |
| 185 | 13.4<br>6 | 0.21 | 14.9<br>0 | 0.31 | 17.1<br>0 | 0.18 | 19.8<br>5 | 0.13 | 26.5<br>8 | 0.16 |
| 186 | 14.4<br>5 | 0.27 | 16.1<br>7 | 0.31 | 16.6<br>8 | 0.31 | 19.4<br>0 | 0.24 | 25.0<br>9 | 0.41 |
| 187 | 15.6<br>3 | 0.26 | 17.7<br>7 | 0.30 | 18.2<br>6 | 0.25 | 20.8<br>1 | 0.24 | 27.7<br>4 | 0.24 |
| 188 | 15.4<br>9 | 0.84 | 16.9<br>6 | 1.00 | 19.7<br>3 | 0.86 | 22.0<br>4 | 0.90 | 29.8<br>4 | 1.02 |
| 189 | 14.1<br>0 | 0.27 | 15.7<br>4 | 0.33 | 17.0<br>4 | 0.27 | 20.1<br>6 | 0.30 | 26.4<br>3 | 0.32 |
| 190 | 14.6<br>5 | 0.84 | 16.4<br>1 | 1.12 | 17.0<br>5 | 0.70 | 20.7<br>3 | 0.84 | 26.5<br>7 | 0.56 |
| 191 | 15.4<br>8 | 0.49 | 16.9<br>3 | 0.54 | 19.1<br>4 | 0.46 | 21.6<br>1 | 0.56 | 28.3<br>3 | 0.81 |
| 192 | 13.2<br>8 | 0.29 | 14.9<br>7 | 0.33 | 16.3<br>1 | 0.33 | 18.6<br>5 | 0.27 | 25.2<br>9 | 0.25 |
| 193 | 13.6<br>2 | 0.30 | 15.0<br>7 | 0.36 | 16.3<br>8 | 0.29 | 19.0<br>8 | 0.23 | 24.8<br>7 | 0.17 |
| 194 | 12.9<br>1 | 0.42 | 14.7<br>8 | 0.49 | 15.6<br>8 | 0.44 | 18.4<br>6 | 0.33 | 24.9<br>7 | 0.63 |
| 196 | 15.3<br>9 | 0.21 | 17.1<br>9 | 0.32 | 17.8<br>0 | 0.19 | 21.3<br>4 | 0.14 | 27.0<br>3 | 0.26 |
| 197 | 15.5<br>9 | 0.30 | 17.3<br>3 | 0.40 | 18.3<br>8 | 0.22 | 21.6<br>8 | 0.18 | 27.8<br>5 | 0.26 |
| 198 | 16.1<br>8 | 0.44 | 18.4<br>6 | 0.74 | 19.4<br>6 | 0.32 | 22.8<br>6 | 0.32 | 30.5<br>5 | 0.29 |

|     |           |      |           |      |           |      |           |      |           |      |
|-----|-----------|------|-----------|------|-----------|------|-----------|------|-----------|------|
| 199 | 16.3<br>8 | 0.35 | 18.2<br>5 | 0.41 | 19.2<br>7 | 0.42 | 20.8<br>9 | 0.22 | 28.0<br>5 | 0.25 |
| 201 | 15.3<br>7 | 0.33 | 16.6<br>8 | 0.40 | 18.6<br>6 | 0.37 | 21.8<br>7 | 0.27 | 27.8<br>3 | 0.15 |
| 202 | 15.6<br>1 | 0.33 | 17.2<br>4 | 0.43 | 19.0<br>2 | 0.33 | 22.0<br>6 | 0.25 | 28.8<br>2 | 0.22 |
| 203 | 12.8<br>0 | 0.28 | 14.1<br>0 | 0.32 | 15.6<br>7 | 0.37 | 17.8<br>5 | 0.32 | 23.7<br>0 | 0.41 |
| 204 | 13.5<br>6 | 1.38 | 15.9<br>5 | 2.08 | 14.6<br>9 | 1.46 | 14.8<br>2 | 1.30 | 20.7<br>9 | 0.88 |
| 206 | 14.1<br>2 | 0.18 | 15.8<br>0 | 0.25 | 16.4<br>3 | 0.16 | 19.6<br>5 | 0.19 | 25.0<br>7 | 0.19 |
| 208 | 11.0<br>7 | 0.26 | 12.5<br>7 | 0.25 | 13.8<br>2 | 0.32 | 15.9<br>9 | 0.26 | 21.9<br>5 | 0.30 |
| 209 | 13.9<br>7 | 0.27 | 15.8<br>4 | 0.33 | 16.0<br>1 | 0.28 | 19.2<br>0 | 0.23 | 24.6<br>7 | 0.23 |
| 210 | 16.6<br>8 | 0.33 | 18.6<br>9 | 0.48 | 19.9<br>9 | 0.33 | 23.4<br>2 | 0.26 | 30.8<br>5 | 0.34 |
| 211 | 12.8<br>7 | 0.20 | 14.3<br>5 | 0.20 | 16.0<br>5 | 0.25 | 19.2<br>7 | 0.21 | 25.4<br>8 | 0.47 |
| 212 | 13.7<br>3 | 0.33 | 15.5<br>3 | 0.46 | 16.0<br>3 | 0.26 | 19.0<br>2 | 0.33 | 24.6<br>1 | 0.44 |
| 215 | 12.5<br>2 | 0.26 | 13.7<br>8 | 0.23 | 15.8<br>4 | 0.41 | 18.2<br>8 | 0.26 | 24.4<br>9 | 0.30 |
| 216 | 14.0<br>4 | 0.29 | 15.5<br>4 | 0.41 | 17.7<br>1 | 0.22 | 20.2<br>6 | 0.15 | 27.2<br>6 | 0.30 |
| 217 | 14.6<br>7 | 0.23 | 16.5<br>0 | 0.39 | 17.4<br>1 | 0.21 | 19.7<br>6 | 0.32 | 26.3<br>9 | 0.25 |
| 218 | 13.1<br>4 | 0.58 | 14.8<br>7 | 0.57 | 16.3<br>7 | 0.70 | 19.6<br>4 | 0.70 | 26.2<br>7 | 0.84 |
| 220 | 10.5<br>8 | 0.12 | 12.1<br>0 | 0.16 | 12.1<br>8 | 0.12 | 14.7<br>0 | 0.14 | 19.0<br>4 | 0.14 |
